# Supplementary material for: Size Dependency of Circulation and Biodistribution of Biomimetic Nanoparticles: Red Blood Cell Membrane-Coated Nanoparticles
Source: PubMed Central journal article supplement (PMC6721642; doi:10.3390/cells8080881), 2019-08-13
Supplement: cells-08-00881-s001.pdf [file cells-08-00881-s001.pdf]

## Supporting materials

# Size dependency of circulation and biodistribution of biomimetic nanoparticles: red blood cell membrane-coated nanoparticles

Haichun Li, Kai Jin, Man Luo, Xuejun Wang, Xiaowen Zhu, Xianping Liu, Ting Jiang, Qin Zhang, Zhiqing Pang\* and Sheng Wang\*

\* Correspondence: zqpang@fudan.edu.cn; Tel.: +86-21-51980067; author initials: Z. Pang; wangs601@163.com; author initials: S. Wang

### Results

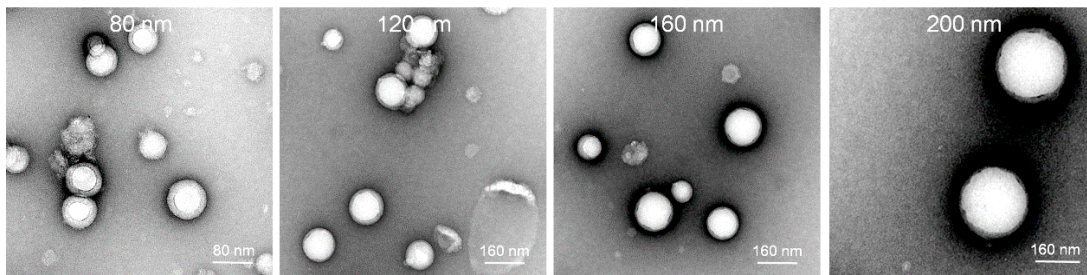

Figure S1 TEM images of RBC-NPs with diameters of 80 nm, 120 nm, 160 nm and 200 nm.

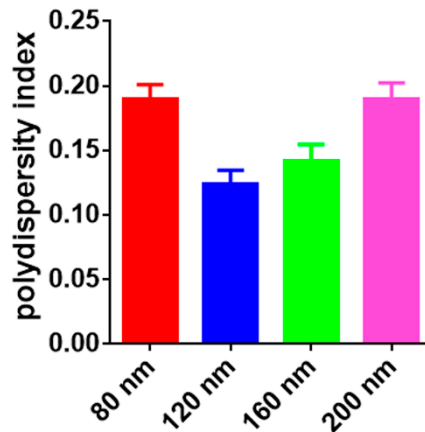

Figure S2 Polydispersity index of RBC-NPs with four different diameters (n=3).
